# Supplementary material for: Penicitroamide, an Antimicrobial Metabolite with High Carbonylization from the Endophytic Fungus Penicillium sp. (NO. 24)
Source: PubMed Central journal article supplement (PMC6274507; doi:10.3390/molecules21111438), 2016-10-28
Supplement: molecules-21-01438-s001.pdf [file molecules-21-01438-s001.pdf]

# Supplementary Materials: Penicitroamide, an Antimicrobial Metabolite with High Carbonylization from the Endophytic Fungus *Penicillium* sp. (NO. 24)

Zi-Wei Feng, Meng-Meng Lv, Xue-Shuang Li, Liang Zhang, Cheng-Xiong Liu, Zhi-Yong Guo, Zhang-Shuang Deng, Kun Zou and Peter Proksch

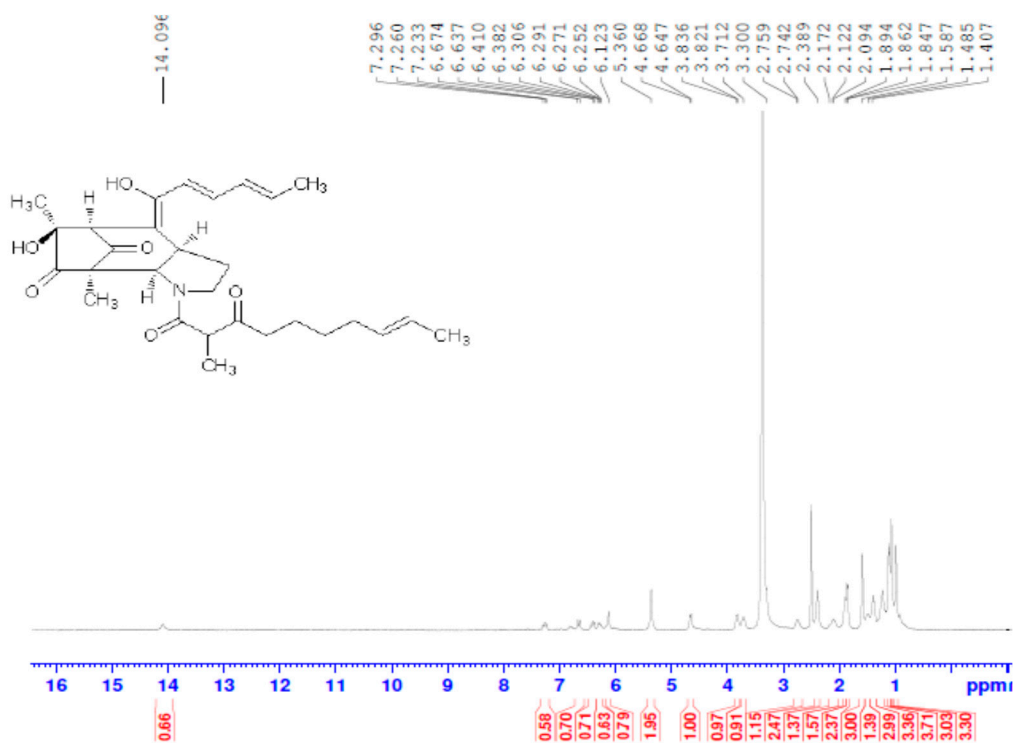

Figure S1. The <sup>1</sup>H NMR spectrum of Penicitroamide (1).

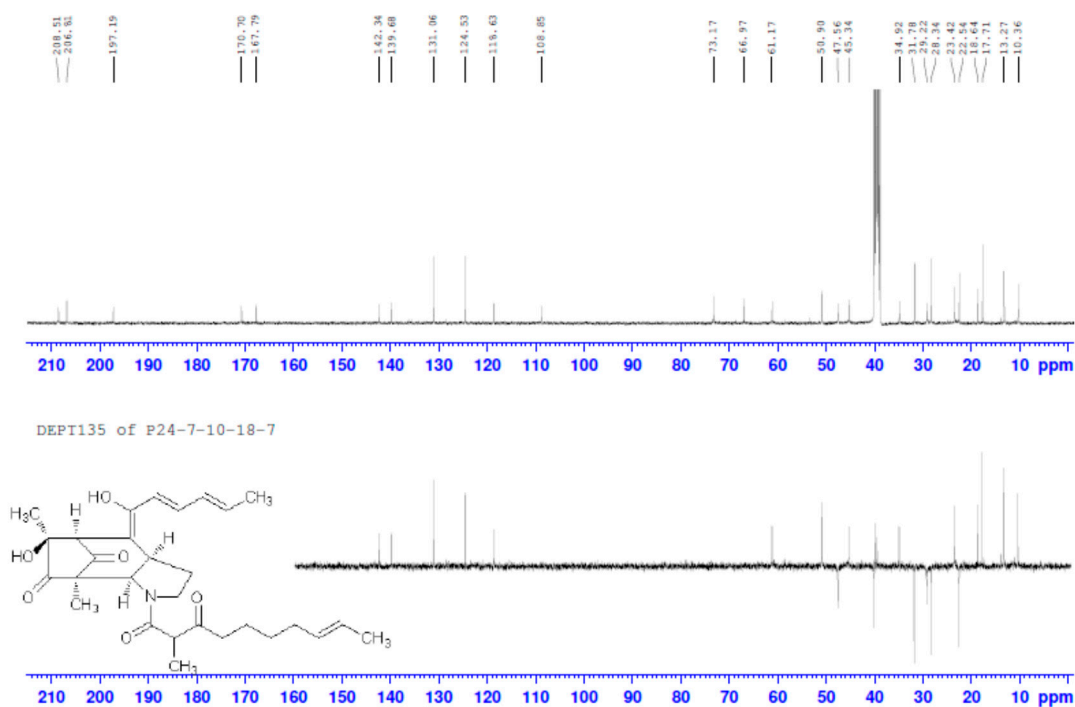

Figure S2. The <sup>13</sup>C and DEPT135 NMR spectra of Penicitroamide (1).

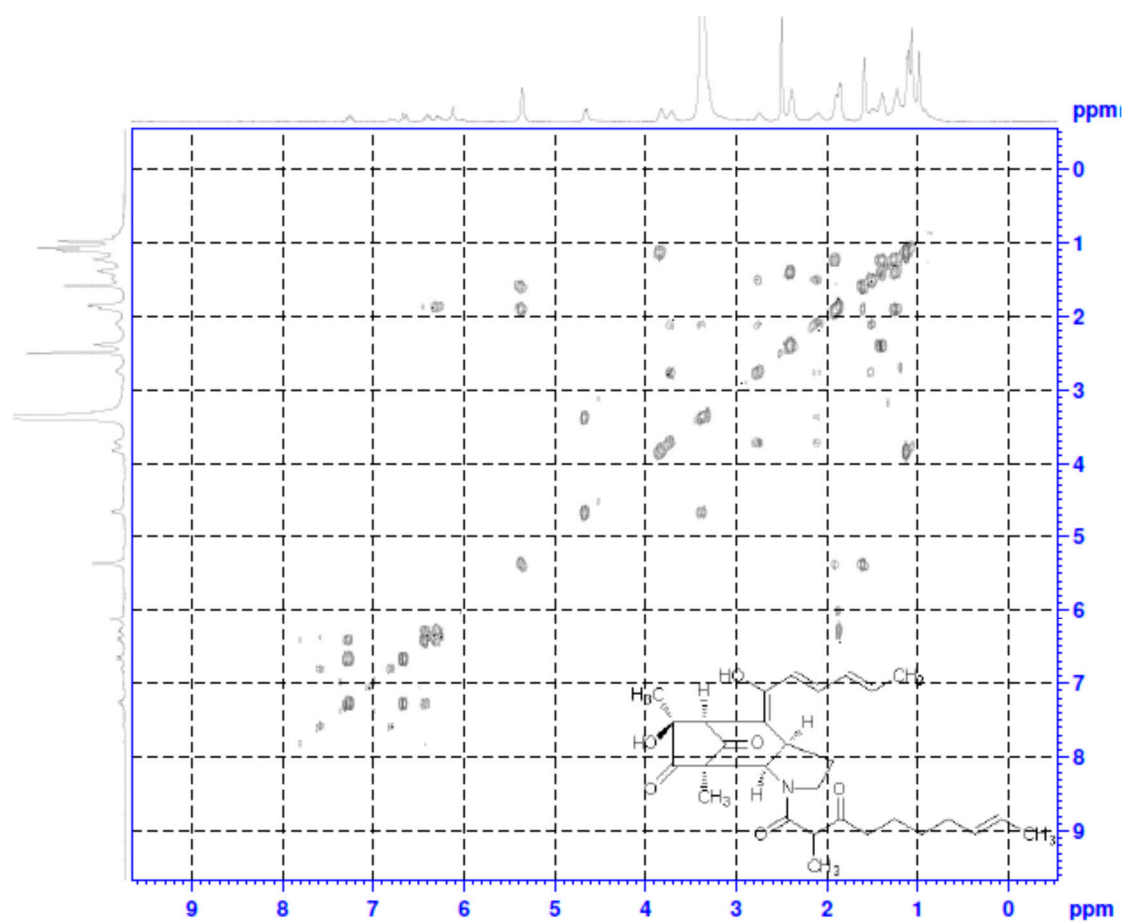

Figure S3. The COSY NMR spectrum of Penicilloamide (1).

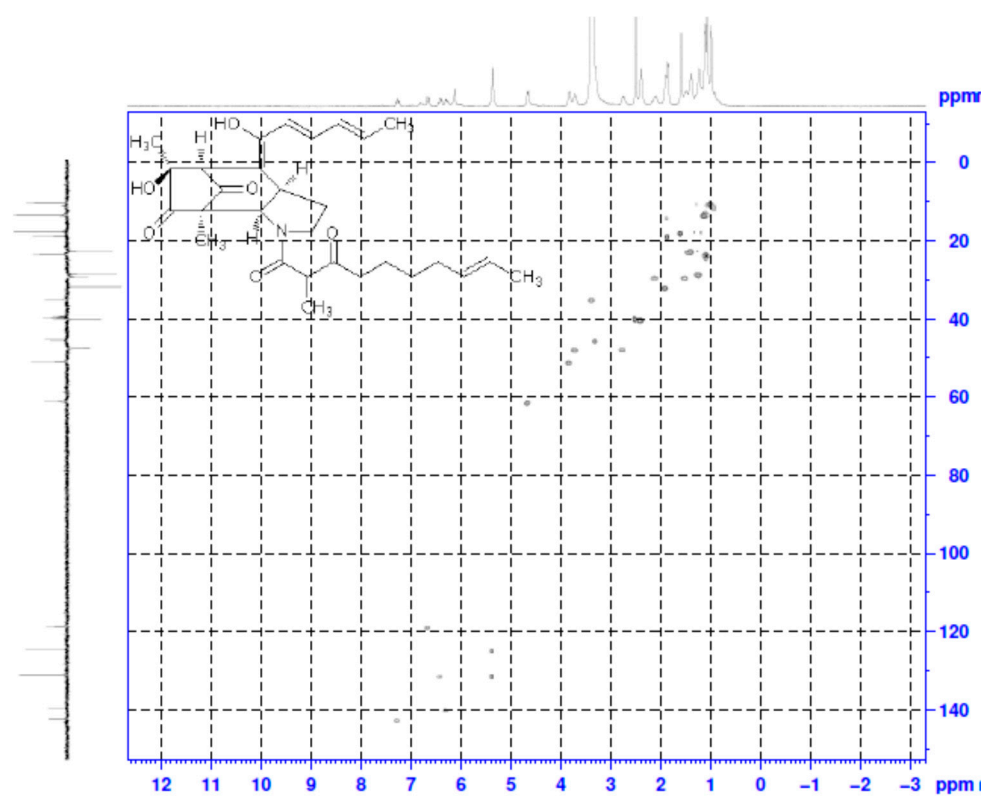

Figure S4. The HSQC NMR spectrum of Penicilloamide (1).

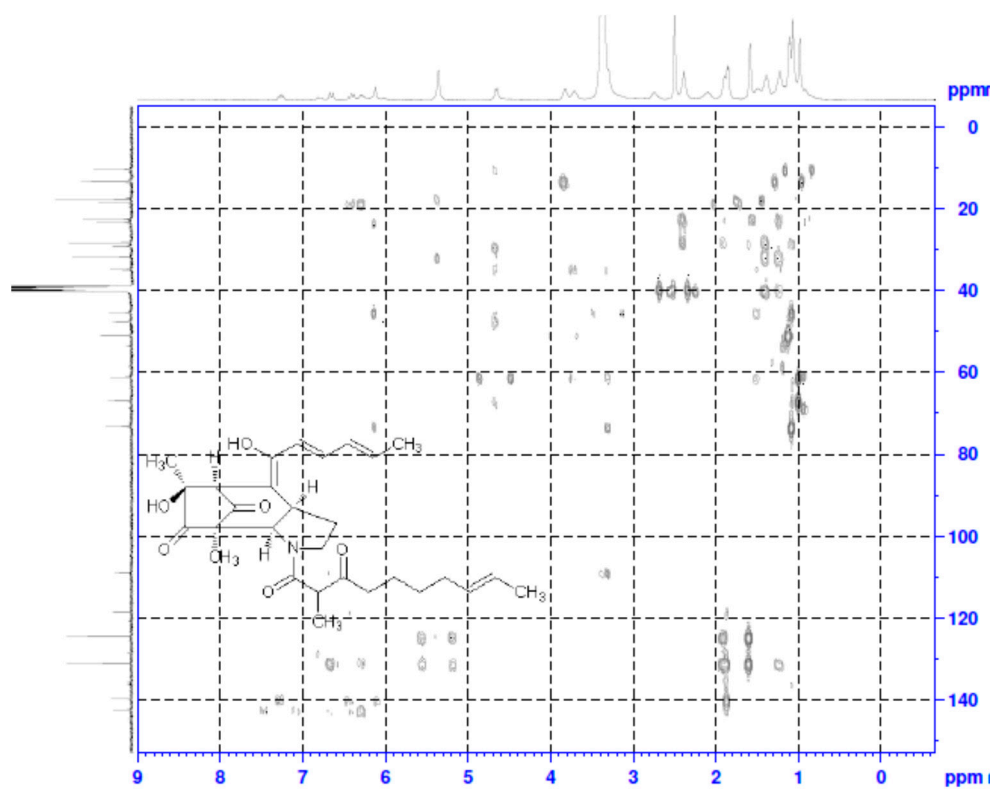

Figure S5. The HMBC NMR spectrum of Penicilloamide (1).

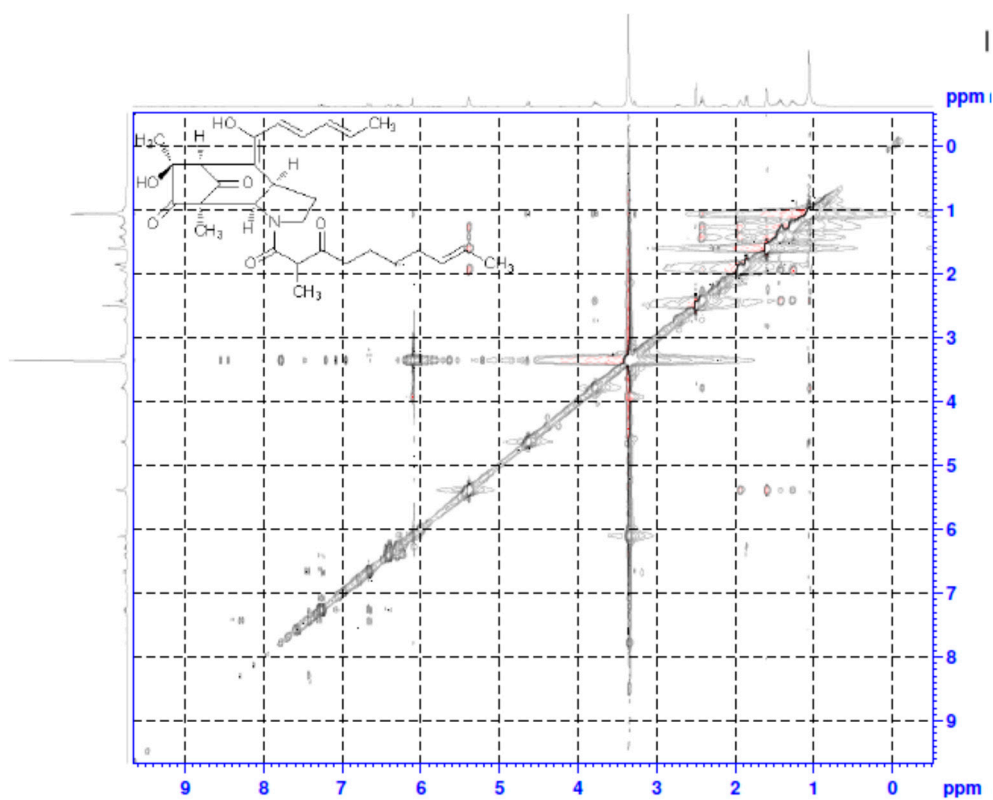

Figure S6. The NOESY NMR spectrum of Penicilloamide (1).

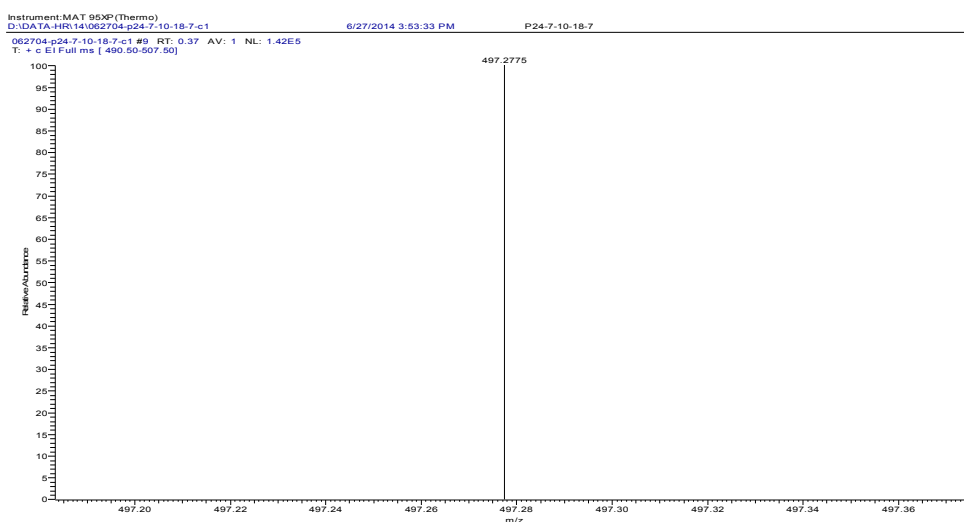

Figure S7. The HR-EI-MS of Penicitroamide (1).

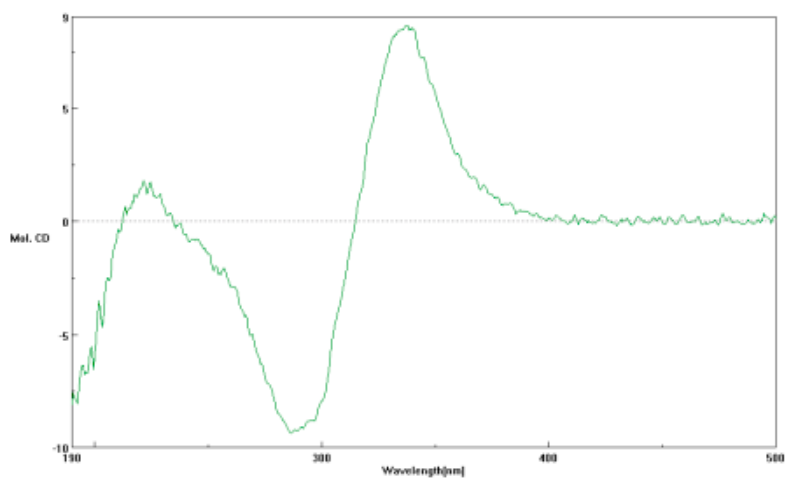

Figure S8. The CD spectrum of Penicitroamide (1).
